# Supplementary material
Source: Springer Nature journal article supplement (https://www.springermedizin.de/resource/supplementary/13000_2012_649_MOESM1_ESM.pdf/9624844)

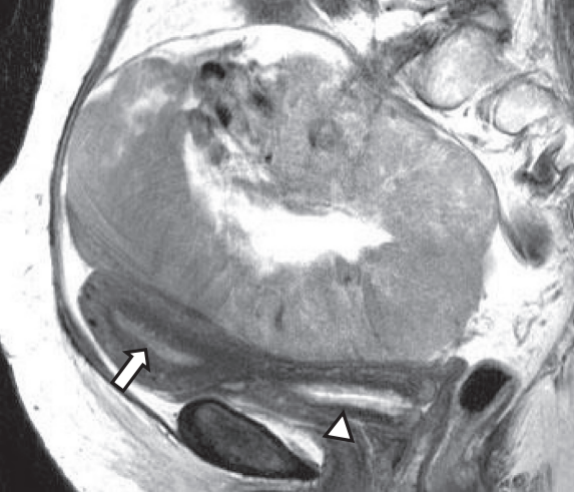

Supplement: MOESM1 [file 9624844]
